# Supplementary material for: Case report: Cryoablation as a novel bridging strategy prior to CAR-T cell therapy for B cell malignancies with bulky disease
Source: PubMed Central journal article supplement (PMC9911860; doi:10.3389/fonc.2023.1008828), 2023-01-27
Supplement: Image_1.pdf [file Image_1.pdf]

## Supplementary materials

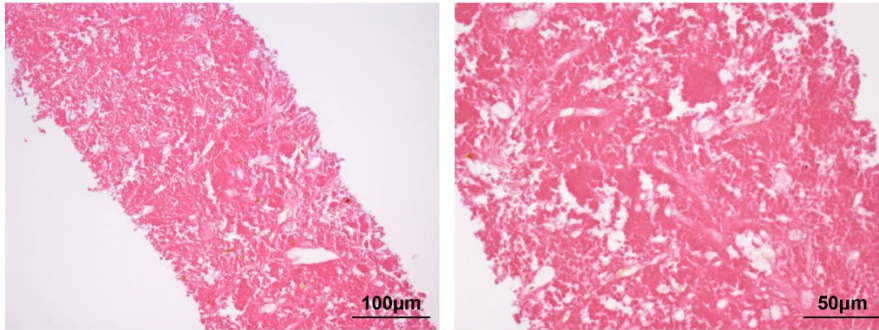

**Figure S1** Hematoxylin and eosin staining of neck mass (original magnification: 100 $\times$  and 200 $\times$ ). The pathological examination revealed the necrosis of neck mass 1 month after CAR-T cell therapy combined with cryoablation.
